# Supplementary material for: Highly stable and ultra-fast vibration-responsive flexible iontronic sensors for accurate acoustic signal recognition
Source: Royal Society of Chemistry journal article supplement (doi:10.1039/d4nr03370a), 2024-01-01
Supplement: d4nr03370a1.pdf [file d4nr03370a1.pdf]

## Supporting Information

### **High stable and ultra-fast vibration-responsive flexible iontronic sensors for accurate acoustic signal recognition**

Yan Wang,<sup>\*a</sup> Weiqiang Liao,<sup>b,c</sup> Xikai Yang,<sup>c</sup> Kexin Wang,<sup>c</sup> Shengpeng Yuan,<sup>b</sup> Dan Liu,<sup>b</sup>  
Cheng Liu,<sup>b</sup> Shiman Yang,<sup>b</sup> Li Wang<sup>\*b</sup>

<sup>a</sup> Physics Laboratory, Industrial Training Center, Shenzhen Polytechnic University, Shenzhen Guangdong 518055, China

<sup>b</sup> Department of Physics, School of Physics and Materials Science, Nanchang University, Nanchang JiangXi 330031, China.

<sup>c</sup> School of Qianhu, Jiluan Academy, Nanchang University, Nanchang JiangXi 330031, China.

\* To whom correspondence should be addressed. E-mail: wangyan@szpu.edu.cn; liwang@ncu.edu.cn.

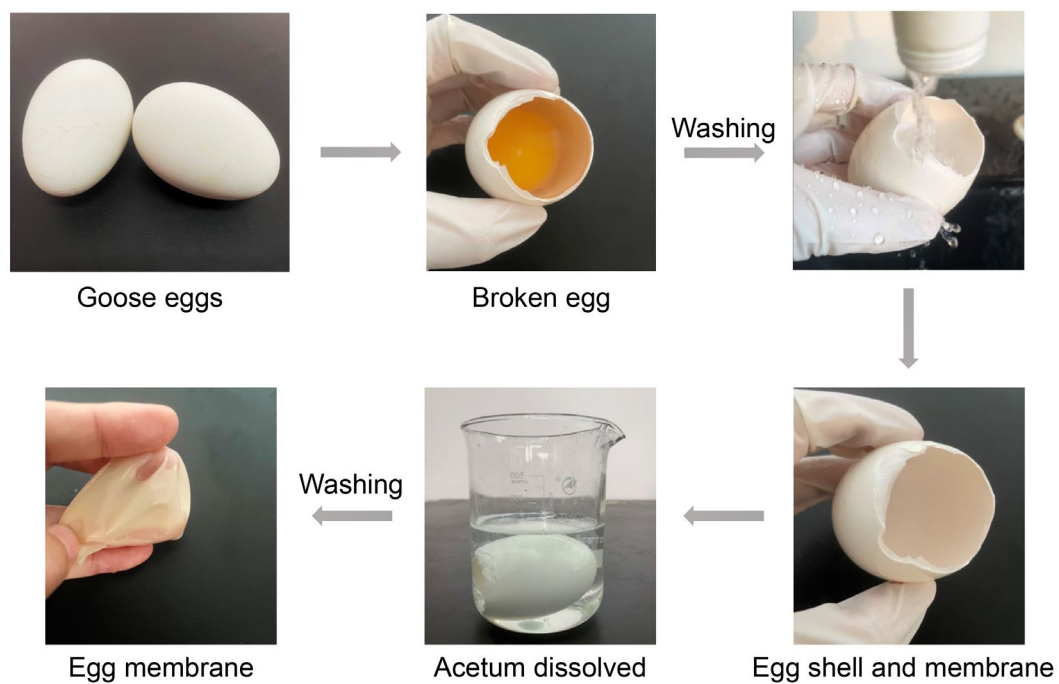

**Figure S1.** Protein micro-fibers derived from microstructured goose eggshell inner membrane.

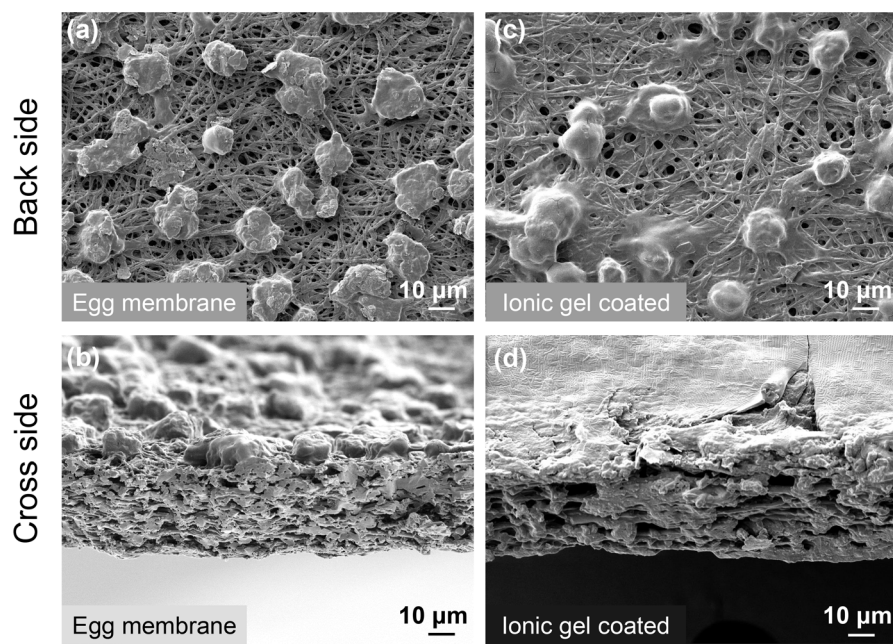

**Figure S2.** SEM image of the eggshell membrane ionic gel coated eggshell membrane.

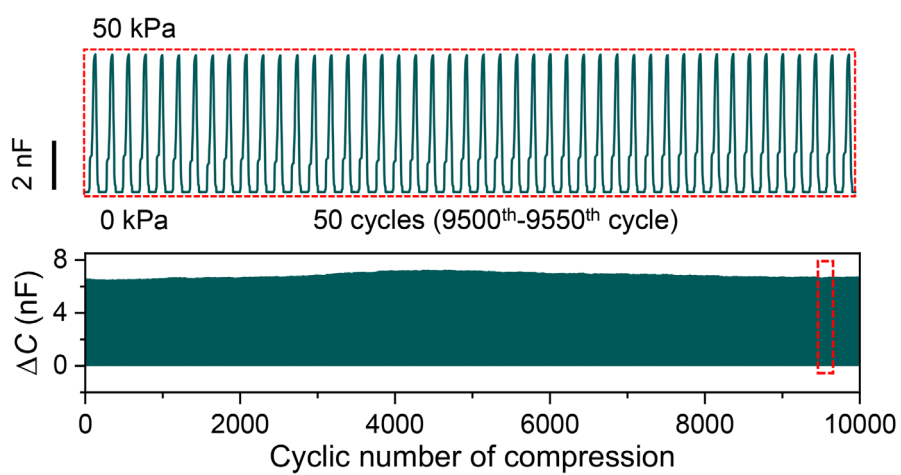

**Figure S3.** Signal stability over 10,000 compression/release cycles at 50 kPa. The inset shows reversible responses from 9500 to 9550 cycles.

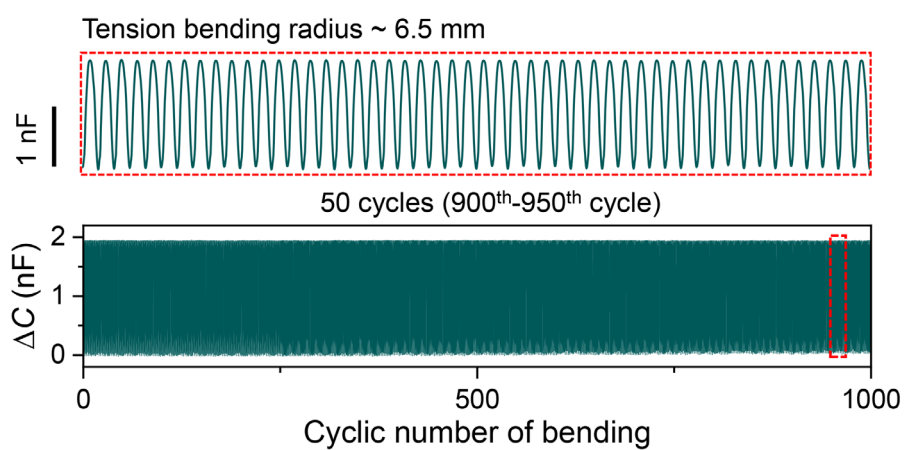

**Figure S4.** Signal stability over 10,00 bending cycles under a bending radius of ~ 6.5 mm. The inset shows reversible responses from 900 to 950 cycles.

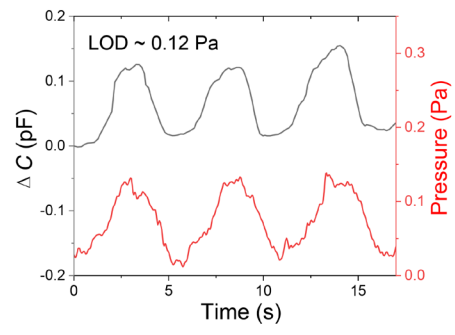

**Figure S5.** The Limit of detection (LOD) of the acoustic sensor.

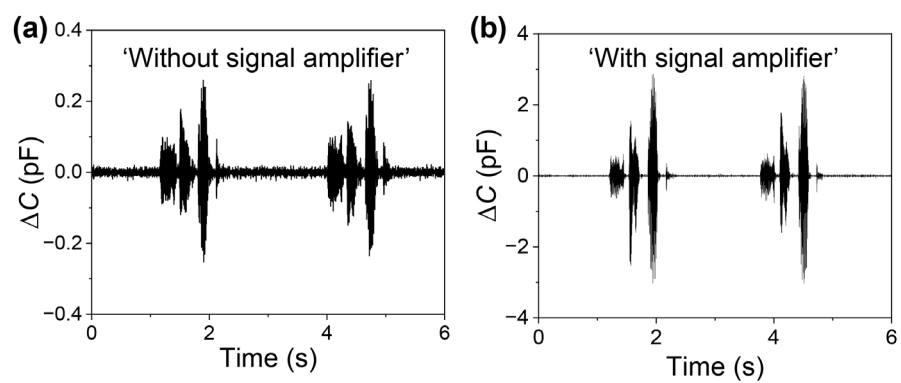

**Figure S6.** The acquired acoustic signal with and without signal amplifier.

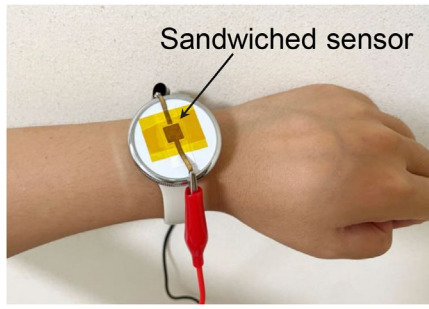

**Figure S7.** The acoustic sensor is embedded on the bracelet for sensing.



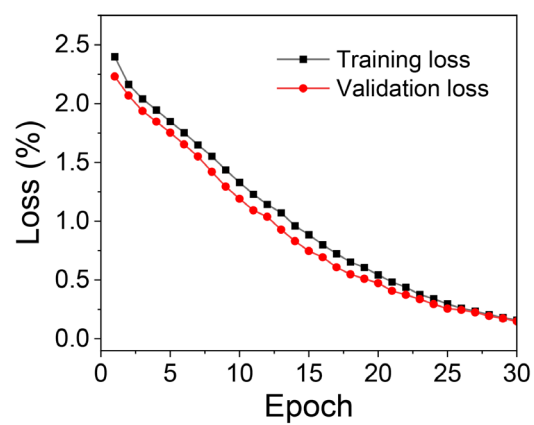

**Figure S8.** The training and testing accuracy curves of the loss function.

**Table S1.** The response and relaxation time of our sensor and previously reported flexible pressure sensors are listed.

| Materials                                                    | Interface bonding | Response time (ms) | Relaxation time (ms) | Durability (cycles) | Limit of detection (Pa) | Reference |
|--------------------------------------------------------------|-------------------|--------------------|----------------------|---------------------|-------------------------|-----------|
| PVA/H <sub>3</sub> PO <sub>4</sub> hydrogel                  | /                 | 9                  | 18                   | 5,000               | 0.08                    | Ref [25]  |
| Ti <sub>3</sub> C <sub>2</sub> T <sub>x</sub> /NMC           | /                 | 14                 | 16                   | 5,000               | 8                       | Ref [28]  |
| PVA/H <sub>3</sub> PO <sub>4</sub> hydrogel                  | /                 | 2.74               | 4.11                 | 10,000              | 10                      | Ref [29]  |
| Graphene/PDM S sponge                                        | /                 | 74                 | 67                   | 3,000               | 100                     | Ref [30]  |
| rGO/PDMS                                                     | /                 | 150                | 40                   | 4,000               | ~10,000 Pa              | Ref [31]  |
| MXene/PU composite                                           | /                 | 68.4               | 46.5                 | 10,000              | 7.8                     | Ref [32]  |
| CNTs/PDMS composite                                          | /                 | 6                  | 6                    | 10,000              | 0.35                    | Ref [33]  |
| PVDF@AgNWs @TiO <sub>2</sub>                                 | /                 | 166.9              | 199                  | 30,000              | 10                      | Ref [34]  |
| Cr/Cu-coated PDMS                                            | No bonding        | 100                | 200                  | 10,000              | 139.6                   | Ref [35]  |
| Ionic liquid coated PVDF                                     | No bonding        | 40                 | 78                   | 5,000               | 0.4                     | Ref [36]  |
| CNTs coated FEP textile                                      | No bonding        | 23.3               | 40                   | 10,000              | 10                      | Ref [37]  |
| PVA/H <sub>3</sub> PO <sub>4</sub> -coated eggshell membrane | Hydrogen bonding  | 0.6                | 0.6                  | 10,000              | 0.12                    | This work |
